# Supplementary material for: COMMD10 Is Essential for Neural Plate Development during Embryogenesis
Source: J Dev Biol. 2023 Mar 16;11(1):13. doi: 10.3390/jdb11010013 (PMC10051640; doi:10.3390/jdb11010013)
Supplement: Supplementary file 1 [file jdb-11-00013-s001.zip › Supplementary Tables.xlsx]

## Sheet: Downregulated in Commd10_Null
GO:Biological Process of the top 20 genes downregulated in Commd10Null embryos
GO: Biological Process [Display Chart] 20 input genes in category / 1191 annotations before applied cutoff / 20720 genes in category
ID	Name	pValue	FDR B&H	FDR B&Y	Bonferroni	Genes from Input	Genes in Annotation
GO:0060429	epithelium development	0.0003004	0.01626	0.1246	0.3577	8	1979
GO:1902680	positive regulation of RNA biosynthetic process	0.0002314	0.01626	0.1246	0.2756	8	1906
GO:1903508	positive regulation of nucleic acid-templated transcription	0.0002264	0.01626	0.1246	0.2696	8	1900
GO:0045893	positive regulation of DNA-templated transcription	0.0002264	0.01626	0.1246	0.2696	8	1900
GO:0045934	negative regulation of nucleobase-containing compound metabolic process	0.001014	0.02454	0.188	1	7	1793
GO:0009887	animal organ morphogenesis	0.0008154	0.02427	0.1859	0.9711	7	1729
GO:0051253	negative regulation of RNA metabolic process	0.0006038	0.0232	0.1777	0.7191	7	1645
GO:1902679	negative regulation of RNA biosynthetic process	0.0003495	0.01665	0.1275	0.4162	7	1504
GO:1903507	negative regulation of nucleic acid-templated transcription	0.0003438	0.01665	0.1275	0.4095	7	1500
GO:0045892	negative regulation of DNA-templated transcription	0.0003396	0.01665	0.1275	0.4045	7	1497
GO:0045944	positive regulation of transcription by RNA polymerase II	0.0002527	0.01626	0.1246	0.301	7	1427
GO:0008284	positive regulation of cell population proliferation	0.0008355	0.02427	0.1859	0.9951	6	1236
GO:0000122	negative regulation of transcription by RNA polymerase II	0.0005024	0.02137	0.1637	0.5983	6	1123
GO:0043010	camera-type eye development	0.0005825	0.02313	0.1772	0.6938	5	744
GO:0030900	forebrain development	0.0002753	0.01626	0.1246	0.3279	5	632
GO:0003002	regionalization	0.0002753	0.01626	0.1246	0.3279	5	632
GO:0042326	negative regulation of phosphorylation	0.0009947	0.02454	0.188	1	4	476
GO:0060041	retina development in camera-type eye	5.478e-05	0.008155	0.06247	0.06524	5	448
GO:0001933	negative regulation of protein phosphorylation	0.0006344	0.02361	0.1809	0.7556	4	422
GO:0021537	telencephalon development	2.934e-05	0.005842	0.04475	0.03494	5	393
GO:0048736	appendage development	0.0001466	0.01348	0.1033	0.1746	4	287
GO:0060173	limb development	0.0001032	0.01117	0.0856	0.1229	4	262
GO:0061351	neural precursor cell proliferation	7.233e-05	0.009572	0.07332	0.08614	4	239
GO:0030178	negative regulation of Wnt signaling pathway	0.00103	0.02454	0.188	1	3	210
GO:0003407	neural retina development	0.0007365	0.02397	0.1836	0.8771	3	187
GO:0060042	retina morphogenesis in camera-type eye	0.0007251	0.02397	0.1836	0.8636	3	186
GO:0021987	cerebral cortex development	0.0005582	0.02293	0.1756	0.6648	3	170
GO:0090090	negative regulation of canonical Wnt signaling pathway	0.0004763	0.02101	0.161	0.5673	3	161
GO:0045666	positive regulation of neuron differentiation	0.0002906	0.01626	0.1246	0.346	3	136
GO:2000177	regulation of neural precursor cell proliferation	0.0002544	0.01626	0.1246	0.303	3	130
GO:0048663	neuron fate commitment	0.0001472	0.01348	0.1033	0.1753	3	108
GO:0007405	neuroblast proliferation	9.143e-05	0.01089	0.08341	0.1089	3	92
GO:2000179	positive regulation of neural precursor cell proliferation	4.968e-05	0.008155	0.06247	0.05917	3	75
GO:0021988	olfactory lobe development	2.943e-05	0.005842	0.04475	0.03505	3	63
GO:0021772	olfactory bulb development	2.541e-05	0.005842	0.04475	0.03026	3	60
GO:1902692	regulation of neuroblast proliferation	1.649e-05	0.005842	0.04475	0.01964	3	52
GO:0032292	peripheral nervous system axon ensheathment	0.0008173	0.02427	0.1859	0.9733	2	44
GO:0072210	metanephric nephron development	0.0007806	0.02427	0.1859	0.9296	2	43
GO:0022011	myelination in peripheral nervous system	0.0007447	0.02397	0.1836	0.8869	2	42
GO:0021846	cell proliferation in forebrain	0.0007096	0.02397	0.1836	0.8452	2	41
GO:0021799	cerebral cortex radially oriented cell migration	0.0007096	0.02397	0.1836	0.8452	2	41
GO:0002052	positive regulation of neuroblast proliferation	4.515e-06	0.005377	0.04119	0.005377	3	34
GO:0021871	forebrain regionalization	0.0004315	0.01977	0.1514	0.5139	2	32
GO:0032808	lacrimal gland development	1.853e-05	0.005842	0.04475	0.02207	2	7
GO:1904937	sensory neuron migration	0.0009661	0.02448	0.1875	1	1	1
GO:1903815	negative regulation of collecting lymphatic vessel constriction	0.0009661	0.02448	0.1875	1	1	1
GO:0120008	positive regulation of glutamatergic neuron differentiation	0.0009661	0.02448	0.1875	1	1	1
GO:0097276	cellular creatinine homeostasis	0.0009661	0.02448	0.1875	1	1	1
GO:0097275	cellular ammonium homeostasis	0.0009661	0.02448	0.1875	1	1	1
GO:0097277	cellular urea homeostasis	0.0009661	0.02448	0.1875	1	1	1

## Sheet: Upregulated in Commd10_Null
GO:Biological Process of the top 15 genes upregulated in Commd10Null embryos
GO: Biological Process [Display Chart] 14 input genes in category / 832 annotations before applied cutoff / 20720 genes in category
ID	Name	pValue	FDR B&H	FDR B&Y	Bonferroni	Genes from Input	Genes in Annotation
GO:0002520	immune system development	0.000414	0.0287	0.2096	0.3444	6	1636
GO:0048534	hematopoietic or lymphoid organ development	0.0003251	0.02459	0.1795	0.2704	6	1565
GO:0030097	hemopoiesis	0.0002644	0.02318	0.1692	0.2199	6	1507
GO:0048872	homeostasis of number of cells	1.777e-05	0.004928	0.03598	0.01478	5	530
GO:0002262	myeloid cell homeostasis	5.067e-05	0.008432	0.06156	0.04216	4	322
GO:0034101	erythrocyte homeostasis	0.0006417	0.0375	0.2738	0.5339	3	260
GO:0030218	erythrocyte differentiation	0.0005527	0.03538	0.2583	0.4599	3	247
GO:0008360	regulation of cell shape	0.0002152	0.02318	0.1692	0.179	3	179
GO:0018149	peptide cross-linking	0.0002786	0.02318	0.1692	0.2318	2	37
GO:0020027	hemoglobin metabolic process	0.0002786	0.02318	0.1692	0.2318	2	37
GO:0060192	negative regulation of lipase activity	7.999e-05	0.01109	0.08099	0.06655	2	20
GO:0032429	regulation of phospholipase A2 activity	2.787e-05	0.005798	0.04233	0.02319	2	12
GO:0010519	negative regulation of phospholipase activity	1.522e-05	0.004928	0.03598	0.01266	2	9
GO:1900138	negative regulation of phospholipase A2 activity	2.542e-06	0.002115	0.01544	0.002115	2	4
GO:0099162	regulation of neurotransmitter loading into synaptic vesicle	0.0006761	0.0375	0.2738	0.5625	1	1
